# Supplementary material for: Non-microtubule tubulin-based backbone and subordinate components of postsynaptic density lattices
Source: Life Sci Alliance. 2021 May 18;4(7):e202000945. doi: 10.26508/lsa.202000945 (PMC8326785; doi:10.26508/lsa.202000945)
Supplement: Supplementary file 4 [file LSA-2020-00945_TableS2.xlsx]

## Sheet: Sheet1
Supplementary Table 2. Proteins identified in lean-type PSDL/PSDL(1%OG).
Asterisks (*) and # indicate MEC components and proteins that are uncommon to the enriched-type PSDL/PSDL(0.75%OG) (see Fig. 5C), respectively.
Accession	Description	MEC	Biochemical data			Score	Coverage (%)	No. of Peptides
			No. of amino acids	MW [kDa]	calc. pI
Dlg family
Q63622	Dlg 2/chapsin110		852	94.8753	6.23975	119.588	7.39	5
P31016	Dlg 4/PSD-95	*	724	80.4158	5.88428	727.025	31.35	16
P97838	Dlgap3/SAPAP3		977	105.925	8.76318	76.44	1.84	1
Other scaffold/Adaptor proteins
P70587	Densin-180		1490	166.774	6.60986	86.59	1.74	2
Q6P730	Disabled homolog 2-interacting protein		996	109.936	7.10791	72.56	1.91	2
Q9Z214	Homer1		366	41.2798	5.52881	120.912	13.93	5
O88801	Homer2		354	40.5384	6.01123	26.32	2.26	1
Q9QX74	Shank2		1474	158.586	7.18115	60.77	1.02	1
NT receptor, Other receptors, Their associated protein
P62813	GABA receptor subunit a-1		455	51.7207	9.30518	61.05	2.2	1
P63138	GABA receptor subunit b-2		474	54.5982	9.31982	51.4	2.53	1
P31422	Metabotropic glutamate receptor 3	#	879	98.8959	7.75244	23.45	2.16	1
P35439	NMDA 1		938	105.442	8.83643	67.22	1.17	1
Junctional protein
Q6P0K8	Junction plakoglobin		745	81.7488	6.13818	49.52	1.34	1
Tubulin
P68370	Tubulin a-1A	*	451	50.1036	5.05908	5706.36	50.78	18
Q5XIF6	Tubulin a-4A	*	448	49.8924	5.05908	3873.33	51.12	18
P85108	Tubulin b-2A	*	445	49.875	4.89404	7319.98	55.51	21
Q3KRE8	Tubulin b-2B	*	445	49.9209	4.89404	7319.98	55.51	21
Q4QRB4	Tubulin b-3	*	450	50.3862	4.93213	4104.7	38	15
Q6P9T8	Tubulin b-4B	*	445	49.769	4.89404	6851.29	49.89	20
P69897	Tubulin b-5	*	444	49.639	4.89404	7321.15	55.63	21
Microtubule-related
P21575	Dynamin-1		864	97.2339	6.87354	175.472	7.64	6
P34926	MAP1A		2774	299.348	4.94482	41.52	0.36	1
P15205	MAP1B		2461	269.477	4.80518	51.1966	1.3	3
P15146	MAP2		1861	202.288	4.85596	52.63	2.04	3
P19332	tau		752	78.5163	6.354	30.34	2.79	2
a-internexin
P23565	a-internexin		505	56.0816	5.22412	98.52	10.89	5
Neurofilament
P19527	Neurofilament light polypeptide		542	61.298	4.65283	65.2067	5.54	3
P16884	Neurofilament heavy polypeptide		1072	115.308	5.84619	44.34	0.84	2
Spectrin，Spectrin complex
P0C6S7	Ankyrin repeat and sterile alpha motif domain-containing protein 1B		1260	139.12	6.30322	125.715	3.41	4
Q9WTP0	Band 4.1-like protein 1		879	98.1821	5.69385	48.75	1.93	1
Q9WU82	Catenin b-1		781	85.4002	5.85889	259.718	14.85	8
P16086	Spectrin a	*	2472	284.462	5.32568	621.356	12.26	22
Q9QWN8	Spectrin b		2388	270.897	5.8335	87.94	1.13	2
Dynein-related
P38650	Cytoplasmic dynein 1 heavy chain 1		4644	531.916	6.45557	320.756	4.8	18
Kinesin, Kinesin-like
Q9WV63	KIF2A		705	79.7426	6.68311	31.59	1.56	1
Actin
P60711	Actin	*	375	41.7097	5.47803	824.223	31.47	9
P68035	Actin, a cardiac muscle 1		377	41.9919	5.38916	517.451	14.59	5
Actin regulation
Q4V7C7	Actin-related protein 3	#	418	47.327	5.88428	21.78	2.87	1
Q6GMN2	Brain-specific angiogenesis inhibitor 1-associated protein 2		535	59.1459	9.0415	85.5908	12.71	5
P55161	Nck-associated protein 1		1128	128.781	6.60986	24.82	0.89	1
Q9ERH3	WD repeat-containing protein 7		1488	163.086	7.02002	57.32	1.41	2
Myosin, Myosin-related
Q64119	Myosin light polypeptide 6		151	16.9641	4.55127	30.96	8.61	1
Q9QYF3	Unconventional myosin-Va		1828	211.63	8.68994	70.96	1.26	2
Q9JLT0	Myosin-10		1976	228.824	5.60498	117.967	2.38	3
Septin
B0BNF1	Septin-8		442	51.2199	6.0874	32.08	4.07	2
CaMKII
P11275	CaMKII a	*	478	54.0805	7.07861	2499.8	43.1	22
P08413	CaMKII b	*	542	60.3636	7.1665	1774.52	27.31	14
P11730	CaMKII g	*	527	59.0011	7.7085	938.409	16.7	9
P15791	CaMKII d	*	533	60.0426	7.26904	1114.39	14.26	8
Channel, Transporter
Q794F9	4F2 cell-surface antigen heavy chain		527	58.0361	5.32568	133.014	8.54	4
P24942	Excitatory amino acid transporter 1	*	543	59.6587	8.39697	1912.85	9.94	4
P31596	Excitatory amino acid transporter 2	*	573	62.0657	6.7417	2338.69	23.73	12
P97849	Long-chain fatty acid transport protein 1	#	646	71.2377	8.45557	23.1	1.24	1
P06685	Na/K-transporting ATPase a-1	*	1023	112.982	5.45264	3081.53	30.89	25
P06686	Na/K-transporting ATPase a-2	*	1020	112.145	5.5542	3160.39	32.84	28
P06687	Na/K-transporting ATPase a-3	*	1013	111.62	5.41455	4057.94	39.09	31
P07340	Na/K-transporting ATPase b-1		304	35.179	8.646	189.79	12.5	3
P13638	Na/K-transporting ATPase b-2	#	290	33.3905	8.30908	50.31	5.17	1
P31647	Na- and Cl-dependent GABA transporter 3		627	69.9003	6.97607	244.787	2.55	1
P11505	Plasma membrane Ca-transporting ATPase 1		1220	134.608	5.85889	277.446	7.7	6
P11506	Plasma membrane Ca-transporting ATPase 2		1243	136.724	5.97314	211.943	5.55	5
Q64568	Plasma membrane Ca-transporting ATPase 3		1258	138.471	5.93506	223.863	6.2	5
Q64542	Plasma membrane Ca-transporting ATPase 4		1203	133.01	6.56592	176.106	5.15	4
P0C5X8	Protein tweety homolog 1	#	450	49.0011	4.98291	22.71	6	2
P11507	Sarcoplasmic/endoplasmic reticulum Ca ATPase 2		1043	114.694	5.33838	138.875	5.75	5
Q63633	Solute carrier family 12 member 5		1139	126.165	6.81494	83.194	5.53	4
Q52KK3	Solute carrier family 25 member 51	#	298	33.7528	9.71533	97.59	6.38	1
P25286	V-type proton ATPase 116 kDa subunit a isoform 1		838	96.2651	6.46826	79.9898	5.25	4
G-ptoetin-related
P59215	G(o) a		354	40.0429	5.52881	625.42	25.99	7
P54311	G(I)/G(S)/G(T) b-1		340	37.353	5.99854	66.4167	5.88	2
P54313	G(I)/G(S)/G(T) b-2		340	37.3071	5.99854	103.11	15.29	4
Small G，Their regulator, Downstream
P61206	ARF 3		181	20.5877	7.43018	71.85	13.81	2
P84083	ARF 5		180	20.5166	6.78564	33.95	11.67	2
Q8CFN2	CDC 42 homolog		191	21.245	6.55127	23.64	5.76	1
Q811U3	ELKS/Rab6-interacting/CAST family member 1		948	108.751	6.60986	59.06	1.27	1
P10536	Rab-1B		201	22.1492	5.73193	191.3	5.47	1
P63012	Rab-3A	*	220	24.9541	5.03369	465.804	42.73	7
Q63941	Rab-3B	*	219	24.7691	5.021	373.917	17.35	3
Q63942	Rab-3D	*	219	24.2748	4.91943	367.264	18.72	3
Q5U316	Rab-35		201	23.0108	8.29443	191.3	5.47	1
P47709	Rabphilin-3A		684	75.7847	8.26514	101.504	8.19	4
Q6RUV5	Ras-related C3 botulinum toxin substrate		192	21.4362	8.49951	23.64	5.73	1
P61589	RhoA		193	21.7681	6.1001	73.6171	18.13	3
P62747	RhoB		196	22.1091	5.23682	48.0232	4.59	1
Q9QUH6	SynGAP1		1308	144.631	9.05615	823.785	18.27	19
Kinase, Phosphatase, Their regulator
P13233	2',3'-cyclic-nucleotide 3'-phosphodiesterase		420	47.2386	8.89502	307.496	12.86	3
Q01062	cGMP-dependent 3',5'-cyclic phosphodiesterase		928	104.597	5.51611	72.79	7	5
O35095	Neurochondrin		729	78.8727	5.61768	22.7	1.51	1
O08662	Phosphatidylinositol 4-kinase a		2096	236.767	7.1958	30.26	0.48	1
O08875	Serine/threonine-protein kinase DCLK1		433	47.6511	5.75732	20.19	3.46	1
Q4QQT4	Serine/threonine-protein phosphatase 2A 65 kDa regulatory subunit A beta isoform	#	601	65.9645	5.09717	23.13	2	1
P63329	Serine/threonine-protein phosphatase 2B catalytic subunit a isoform		521	58.6063	5.85889	59.12	2.3	1
Q9QXY2	SRC kinase signaling inhibitor 1		1197	129.665	9.36377	172.343	5.01	5
Membrane raft
Q812E9	Neuronal membrane glycoprotein M6-a		278	31.1744	5.2749	73.37	12.95	4
Membrane trafficking, Secretion, Cell fusion
P84092	AP-2 complex subunit m		435	49.623	9.53955	264.173	21.61	8
P62944	AP-2 complex subunit b		937	104.486	5.37646	71.3103	5.02	5
P18484	AP-2 complex subunit a-2		938	103.979	6.93213	58.5944	2.35	2
P85969	b-soluble NSF attachment protein		297	33.4485	5.46533	60.4218	8.08	2
P11442	Clathrin heavy chain 1	#	1675	191.477	5.71924	523.748	10.93	13
Q9JKE3	Secretory carrier-associated membrane protein 5	#	235	26.081	8.54346	40.73	4.68	1
Q6AXV4	Sorting and assembly machinery component 50 homolog		469	51.9274	6.80029	24.12	2.56	1
P60881	SNAP-25		206	23.3002	4.76709	91.02	7.77	1
P32851	Syntaxin-1A		288	33.0467	5.23682	33.74	7.29	2
P61265	Syntaxin-1B		288	33.2238	5.37646	24.57	5.9	2
P61765	Syntaxin-binding protein 1	*	594	67.5259	6.96143	847.389	28.96	12
P63045	Vesicle-associated membrane protein 2		116	12.6827	8.1333	151.604	34.48	2
Q9QUL6	Vesicle-fusing ATPase	*	744	82.6	6.99072	2812.08	48.25	31
Heat shock protein, Chaperone
P63102	14-3-3 protein z/d		245	27.7537	4.79248	78.1074	13.06	2
P61983	14-3-3 protein g		247	28.2849	4.89404	117.115	10.12	2
P06761	78 kDa glucose-regulated protein	*	654	72.3024	5.16064	88.43	1.68	1
P63018	Hsc 71	*	646	70.8272	5.51611	415.491	15.63	8
P14659	Heat shock-related 70 kDa protein 2		633	69.5987	5.66846	268.356	8.21	4
Transcription factor, Nuclear protein
P86252	Pur-a (Fragments)		138	15.3126	4.80518	23.55	7.25	1
Ubiquitination
P0CG51	Polyubiquitin-B	*	305	34.3475	7.53271	127.24	20.98	1
Presynaptic
O88778	bassoon	*	3938	418.168	7.7085	384.533	5.71	16
Q8K3M6	ERC protein 2		957	110.55	7.10791	206.522	9.93	7
P09951	Synapsin-1	*	704	73.9426	9.80322	902.361	39.06	16
Q63537	Synapsin-2	*	586	63.4168	8.57275	829.582	31.06	11
Q02563	Synaptic vesicle glycoprotein 2A		742	82.6079	5.56689	179.637	9.7	6
Q63564	Synaptic vesicle glycoprotein 2B	#	683	77.4512	5.64307	35.07	1.32	1
Q62876	Synaptogyrin-1		234	25.6523	4.65283	53.73	5.13	1
P07825	Synaptophysin		307	33.2891	5.021	24.44	3.26	1
P21707	Synaptotagmin-1		421	47.3687	8.41162	40.66	3.09	1
P37377	a-synuclein		140	14.5062	4.76709	25.86	11.43	1
Glia, Myelin
P47819	GFAP	*	430	49.9266	5.43994	708.17	7.21	3
P02688	MBP	*	195	21.489	11.2388	728.466	31.79	8
P60203	Myelin proteolipid protein		277	30.0571	8.35303	91.52	8.66	2
Oxidation, Reduction
Q9JHY2	Sideroflexin-3	*	321	35.4106	9.74463	652.273	35.2	8
Q8CFD0	Sideroflexin-5		342	37.2808	9.43701	80.8802	19.59	6
P35704	Peroxiredoxin-2		198	21.7701	5.59229	60.0442	5.56	1
Metabolic pathway
P47858	ATP-dependent 6-phosphofructokinase, muscle type		780	85.5057	8.00146	125.789	7.31	5
P47860	ATP-dependent 6-phosphofructokinase, platelet type		788	85.6654	7.28369	155.219	7.49	5
P47942	Dihydropyrimidinase-related protein 2		572	62.2386	6.37939	46.21	1.75	1
P05065	Fructose-bisphosphate aldolase A	*	364	39.3273	8.08936	339.006	20.88	6
P04797	Glyceraldehyde-3-phosphate dehydrogenase	*	333	35.8052	8.03076	1404.19	31.83	7
P04642	L-lactate dehydrogenase A chain		332	36.4273	8.26514	109.189	6.63	2
P42123	L-lactate dehydrogenase B chain		334	36.5891	6.04932	93.2495	3.59	1
Primarily mitochondrial
Q5XI78	2-oxoglutarate dehydrogenase	*	1023	116.221	6.771	279.629	13.98	11
P17764	Acetyl-CoA acetyltransferase	*	424	44.6664	8.76318	563.86	27.36	8
Q05962	ADP/ATP translocase 1	*	298	32.9682	9.78857	1897.62	56.71	20
Q09073	ADP/ATP translocase 2	*	298	32.8801	9.72998	2008.24	52.68	17
P00507	Aspartate aminotransferase	*	430	47.2841	8.99756	51.41	3.26	1
P15999	ATP synthase a	*	553	59.7166	9.18799	5691.61	44.85	26
P10719	ATP synthase b	*	529	56.3185	5.33838	3253.39	47.45	15
P35434	ATP synthase d		168	17.5842	5.23682	259.6	11.9	2
P29418	ATP synthase e		51	5.76311	10.0083	20.91	15.69	1
P35435	ATP synthase g	＊	273	30.1717	8.83643	907.055	32.23	8
P31399	ATP synthase d	#	161	18.7516	6.59521	176.462	24.84	3
P29419	ATP synthase e		71	8.24948	9.34912	161.254	45.07	4
D3ZAF6	ATP synthase f	*	88	10.4456	10.0376	296.33	26.14	3
Q6PDU7	ATP synthase g		103	11.4261	9.5835	405.655	49.51	3
Q06647	ATP synthase O		213	23.3828	10.0229	575.816	42.72	9
P19511	ATP synthase F(0) complex subunit B1		256	28.8505	9.36377	303.063	13.67	4
P11608	ATP synthase protein 8	#	67	7.62494	9.31982	30.39	19.4	1
Q3KRE0	ATPase family AAA domain-containing protein 3		591	66.7175	9.29053	20.03	2.88	2
O35796	Complement component 1 Q subcomponent-binding protein	*	279	30.9775	4.86865	89.94	4.66	1
Q68FY0	Cytochrome b-c1 complex subunit 1		480	52.8154	5.88428	415.738	23.54	8
P32551	Cytochrome b-c1 complex subunit 2	*	452	48.3662	9.14404	423.296	13.94	6
Q5M9I5	Cytochrome b-c1 complex subunit 6	#	89	10.417	4.97021	97.36	20.22	1
Q7TQ16	Cytochrome b-c1 complex subunit 8	*	82	9.84321	10.521	66.7378	29.27	3
P20788	Cytochrome b-c1 complex subunit Rieske	#	274	29.4272	8.86572	46.9167	10.58	2
P29147	D-b-hydroxybutyrate dehydrogenase	#	343	38.1773	8.83643	98.0874	9.04	2
Q6P6R2	Dihydrolipoyl dehydrogenase		509	54.0041	7.86963	25.24	3.73	1
P08461	Dihydrolipoyllysine-residue acetyltransferase component of pyruvate dehydrogenase complex	*	632	67.1234	8.52881	420.353	18.83	7
Q01205	Dihydrolipoyllysine-residue succinyltransferase component of 2-oxoglutarate dehydrogenase complex	*	454	48.8944	8.68994	156.522	14.54	6
Q2TA68	Dynamin-like 120 kDa protein		960	111.238	7.53271	524.365	15.73	12
P85834	Elongation factor Tu		452	49.491	7.56201	61.1225	9.29	4
P56571	ES1 protein homolog		266	28.1549	8.92432	25.49	7.14	2
P10860	Glutamate dehydrogenase 1		558	61.3773	8.00146	100.839	4.84	2
P05708	Hexokinase-1	*	918	102.342	6.7124	2013.25	33.44	28
P56574	Isocitrate dehydrogenase [NADP]	#	452	50.9349	8.68994	56.38	2.88	1
Q99NA5	Isocitrate dehydrogenase [NAD] subunit a		366	39.588	6.91748	39.589	6.01	2
Q68FX0	Isocitrate dehydrogenase [NAD] subunit b		385	42.3268	8.74854	113.72	6.75	2
P41565	Isocitrate dehydrogenase [NAD] subunit g 1		393	42.8242	8.89502	64.9533	4.83	2
Q5SGE0	Leucine-rich PPR motif-containing protein		1392	156.554	6.60986	457.764	9.7	10
F1LU71	Methylglutaconyl-CoA hydratase		315	33.32	9.42236	101.25	12.38	4
D4A7N1	MICOS complex subunit Mic25		261	29.1928	7.94287	25.85	5.36	1
P97700	Mitochondrial 2-oxoglutarate/malate carrier protein	*	314	34.2209	9.87646	310.544	27.07	8
Q505J6	Mitochondrial glutamate carrier 2	*	320	34.1478	9.17334	453.809	6.56	2
Q3KR86	Mitochondrial inner membrane protein (Fragment)		609	67.1352	5.79541	262.591	15.76	8
P63031	Mitochondrial pyruvate carrier 1		109	12.4463	9.61279	70	8.26	2
P38718	Mitochondrial pyruvate carrier 2		127	14.2486	10.4771	33.18	7.87	1
Q8R500	Mitofusin-2	#	757	86.0678	6.94678	22.71	1.06	1
P16036	Phosphate carrier protein	*	356	39.4194	9.33447	715.841	16.85	7
P67779	Prohibitin		272	29.8019	5.75732	97.52	11.03	3
P26284	Pyruvate dehydrogenase E1 component subunit a, somatic form		390	43.1986	8.19189	80.9189	8.46	3
P49432	Pyruvate dehydrogenase E1 component subunit b		359	38.957	6.65381	109.719	7.52	2
P13086	Succinate-CoA ligase [ADP/GDP-forming] a	*	346	36.125	9.48096	228.469	13.29	4
P32089	Tricarboxylate transport protein	*	311	33.8138	9.86182	91.8379	9.65	3
Q64428	Trifunctional enzyme subunit alpha		763	82.6125	9.05615	106.38	4.72	2
Q9JJW3	Up-regulated during skeletal muscle growth protein 5		58	6.40337	9.83252	93.1129	27.59	2
P81155	VDAC2		295	31.7256	7.48877	97.8639	7.46	2
Q9R1Z0	VDAC3		283	30.7784	8.70459	93.0235	3.53	1
Protein synthesis
P49242	40S ribosomal protein S3a	#	264	29.9257	9.72998	28.48	4.55	1
P62243	40S ribosomal protein S8		208	24.1902	10.3159	59	11.54	2
P62850	40S ribosomal protein S24	#	133	15.4134	10.7847	33.79	9.02	1
P62853	40S ribosomal protein S25	*	125	13.7337	10.1108	26.08	8	1
P21531	60S ribosomal protein L3	#	403	46.1068	10.2134	33.84	2.23	1
Q63507	60S ribosomal protein L14		214	23.3241	11.1069	52.75	5.61	1
P47198	60S ribosomal protein L22		128	14.7797	9.02686	30.64	10.16	1
P62890	60S ribosomal protein L30		115	12.7757	9.62744	46.47	13.91	1
P62630	Elongation factor 1-a1	*	462	50.0821	9.01221	142.164	7.58	3
P62632	Elongation factor 1-a2	*	463	50.4223	9.02686	174.176	12.74	4
Others
Q5FVI4	Cell cycle exit and neuronal differentiation protein 1		149	15.0339	8.96826	112.88	25.5	2
P02091	Hemoglobin subunit b-1		147	15.9692	8.07471	105.768	21.09	3
P11517	Hemoglobin subunit b-2		147	15.9723	8.79248	99.1074	21.09	3
Q9Z142	Transmembrane protein 33	#	247	27.9648	9.65674	21.23	4.86	1
P14650	Thyroid peroxidase	#	914	101.396	7.00537	24.98	0.66	1
		*	58
		#	22
		Sum	208
