# Supplementary material for: Non-microtubule tubulin-based backbone and subordinate components of postsynaptic density lattices
Source: Life Sci Alliance. 2021 May 18;4(7):e202000945. doi: 10.26508/lsa.202000945 (PMC8326785; doi:10.26508/lsa.202000945)
Supplement: Supplementary file 5 [file LSA-2020-00945_TableS3.xlsx]

## Sheet: 3mix(,空間詰め
Table S3. Protein components of the MEC of the PSDL preparation.
The MEC proteins of the PSDL are common components of the MPEX PTS-insoluble fractions of three types of PSDL preparations (Fig. 5).
Accession	Description	Biochmical data			Score	coverage (%)	No. of Proteins	No. of Peptides	emPAI (1%OG-11U-IS)
		No. of amino acids	MW [kDa]	calc. pI
Dlg family
P31016	Dlg4/PSD-95	724	80.4158	5.88428	2208.03	36.19	1	23	1.05
Tubulin
P68370	Tubulin a-1A	451	50.1036	5.05908	10916.6	54.1	2	20	3.52
Q5XIF6	Tubulin a-4A	448	49.8924	5.05908	8143.32	54.69	1	21	3.27
P85108	Tubulin b-2A	445	49.875	4.89404	13567.4	59.55	1	21	10.17
Q3KRE8	Tubulin b-2B	445	49.9209	4.89404	13412.7	59.55	1	21	10.17
Q4QRB4	Tubulin b-3	450	50.3862	4.93213	10356.6	39.56	1	15	5.58
Q6P9T8	Tubulin b-4B	445	49.769	4.89404	13743.9	53.93	1	20	10.22
P69897	Tubulin b-5	444	49.639	4.89404	15309.5	59.68	1	21	10.28
Spectrin, Spectrin complex
P16086	Spectrin a	2472	284.462	5.32568	4080.77	49.96	1	121	0.24
Actin
P60711	Actin	375	41.7097	5.47803	2838.66	62.93	2	21	1.67
CaMKII
P11275	CaMKII a	478	54.0805	7.07861	7814.31	52.51	1	29	4.46
P08413	CaMKII b	542	60.3636	7.1665	6546.69	53.87	1	28	1.44
P11730	CaMKII g	527	59.0011	7.7085	4355.37	37.38	1	19	0.9
P15791	CaMKII d	533	60.0426	7.26904	3650.37	37.9	1	22	0.88
Channel, Transporter
P24942	Excitatory amino acid transporter 1	543	59.6587	8.39697	990.252	14.55	2	6
P31596	Excitatory amino acid transporter 2	573	62.0657	6.7417	1404.73	24.61	1	12
P06685	Na/K-transporting ATPase a-1	1023	112.982	5.45264	3406.69	31.38	1	27
P06686	Na/K-transporting ATPase a-2	1020	112.145	5.5542	3516.04	31.18	3	28
P06687	Na/K-transporting ATPase a-3	1013	111.62	5.41455	4610.53	42.55	4	37
Small G-protein, Their regulator, Downstream
P63012	Rab-3A	220	24.9541	5.03369	786.454	23.64	8	5
Q63941	Rab-3B	219	24.7691	5.021	451.607	16.44	8	4
Q63942	Rab-3D	219	24.2748	4.91943	454.899	16.44	9	4
Membrane trafficking, Secretion, Cell fusion
P61765	Syntaxin-binding protein 1	594	67.5259	6.96143	859.38	15.99	1	8
Q9QUL6	Vesicle-fusing ATPase	744	82.6	6.99072	2319.48	44.49	1	30
Heat shock protein, Chaperone
P06761	78 kDa glucose-regulated protein	654	72.3024	5.16064	267.244	5.96	1	3
P63018	Hsc 71	646	70.8272	5.51611	1798.08	41.8	4	26	0.57
Ubiquitination
P0CG51	Polyubiquitin-B	305	34.3475	7.53271	241.857	69.51	4	5
Presynapitc protein
O88778	bassoon	3938	418.168	7.7085	9194.34	36.82	1	108	0.09
P09951	Synapsin-1	704	73.9426	9.80322	2722	43.32	1	19	1.18
Q63537	Synapsin-2	586	63.4168	8.57275	1425.78	32.42	2	13
Glia, Myelin
P47819	GFAP	430	49.9266	5.43994	1307.82	25.81	1	9
P02688	MBP	195	21.489	11.2388	1204.77	34.87	1	8
Oxidation, Reduction
Q9JHY2	Sideroflexin-3	321	35.4106	9.74463	1015.8	27.41	2	8
Metabolic pathway
P05065	Fructose-bisphosphate aldolase A	364	39.3273	8.08936	1342.89	36.81	1	15
P04797	Glyceraldehyde-3-phosphate dehydrogenase	333	35.8052	8.03076	3078.44	51.05	2	15
Primarily mitochondrial
Q5XI78	2-oxoglutarate dehydrogenase	1023	116.221	6.771	172.354	18.28	1	15
P17764	Acetyl-CoA acetyltransferase	424	44.6664	8.76318	1251.8	30.42	1	9
Q05962	ADP/ATP translocase 1	298	32.9682	9.78857	2273.17	56.71	1	18	10.92
Q09073	ADP/ATP translocase 2	298	32.8801	9.72998	2011.48	58.39	1	20	11.02
P00507	Aspartate aminotransferase	430	47.2841	8.99756	181.016	19.53	1	9
P15999	ATP synthase a	553	59.7166	9.18799	4812.11	49.55	1	25	4.54
P10719	ATP synthase b	529	56.3185	5.33838	2828.15	39.13	1	17
P35435	ATP synthase g	273	30.1717	8.83643	542.937	40.66	1	10
D3ZAF6	ATP synthase f	88	10.4456	10.0376	196.86	25	1	3
O35796	Complement component 1 Q subcomponent-binding protein	279	30.9775	4.86865	79.15	26.16	1	5
P32551	Cytochrome b-c1 complex subunit 2	452	48.3662	9.14404	745.578	15.49	1	7
Q7TQ16	Cytochrome b-c1 complex subunit 8	82	9.84321	10.521	91.3888	35.37	1	4
Q01205	Dihydrolipoyllysine-residue succinyltransferase component of 2-oxoglutarate dehydrogenase	454	48.8944	8.68994	247.414	14.98	1	8
P08461	Dihydrolipoyllysine-residue acetyltransferase component of pyruvate dehydrogenase	632	67.1234	8.52881	503.231	41.3	1	21
P05708	Hexokinase-1	918	102.342	6.7124	733.444	26.58	2	22
P97700	Mitochondrial 2-oxoglutarate/malate carrier protein	314	34.2209	9.87646	1428.43	32.48	1	10
Q505J6	Mitochondrial glutamate carrier 2	320	34.1478	9.17334	675.297	9.06	1	3
P16036	Phosphate carrier protein	356	39.4194	9.33447	1333.03	26.97	1	11
P13086	Succinate-CoA ligase a	346	36.125	9.48096	453.768	30.06	1	7
P32089	Tricarboxylate transport protein	311	33.8138	9.86182	355.642	13.5	1	4
Protein synthesis
P62853	40S ribosomal protein S25	125	13.7337	10.1108	109.43	15.2	1	2
P62630	Elongation factor 1-a1	462	50.0821	9.01221	486.359	15.8	1	6
P62632	Elongation factor 1-a2	463	50.4223	9.02686	376.079	13.39	1	5

## Sheet: BennDiagram
	Exclusive	Total	Label
	73	208	170906_1%OG-IS-11B
	2	73	180330_1%OG-11U-IS
	189	336	190726_0.75%OG-11U-IS
	0	59	170906_1%OG-IS-11B / 180330_1%OG-11U-IS
	12	71	180330_1%OG-11U-IS / 190726_0.75%OG-11U-IS
	76	135	170906_1%OG-IS-11B / 190726_0.75%OG-11U-IS
	58	58	170906_1%OG-IS-11B / 180330_1%OG-11U-IS / 190726_0.75%OG-11U-IS
Sum	410
