# Supplementary material for: Non-microtubule tubulin-based backbone and subordinate components of postsynaptic density lattices
Source: Life Sci Alliance. 2021 May 18;4(7):e202000945. doi: 10.26508/lsa.202000945 (PMC8326785; doi:10.26508/lsa.202000945)
Supplement: Supplementary file 11 [file LSA-2020-00945_TableS5.xlsx]

## Sheet: Sheet1
Table S3. Subcellular distribution of “primarily mitochondrial proteins” in enriched-type PSDL/PSDL(0.75%OG).
The subcellular localization of each protein was based on the SwissProt database. “1” (colored) indicates the presence on the corresponding subcellular sites. Asterisks (*) indicate MEC components.
Accession	Description	MEC	Cellular component
			cell surface	chromosome	cytoplasm	cytoskeleton	cytosol	ER	endosome	extracellular	Golgi	membrane	nucleus	mitochondrion
Q5XI78	2-oxoglutarate dehydrogenase	*					1					1		1
P13437	3-ketoacyl-CoA thiolase											1		1
P63039	60 kDa heat shock protein		1		1		1	1	1		1	1		1
P17764	Acetyl-CoA acetyltransferase	*										1		1
Q9ER34	Aconitate hydratase											1		1
Q05962	ADP/ATP translocase 1	*										1	1	1
Q09073	ADP/ATP translocase 2	*										1	1	1
P00507	Aspartate aminotransferase	*	1									1		1
P15999	ATP synthase a	*										1		1
P10719	ATP synthase b	*	1									1	1	1
P35434	ATP synthase d											1		1
P29418	ATP synthase e											1		1
P35435	ATP synthase g	*										1		1
P29419	ATP synthase e											1		1
D3ZAF6	ATP synthase f	*										1	1	1
Q6PDU7	ATP synthase g											1		1
Q06647	ATP synthase O											1	1	1
D3Z9R8	ATP synthase ATP5MPL											1		1
P19511	ATP synthase F(0) complex subunit B1											1	1	1
Q03344	ATPase inhibitor		1											1
Q8K3P6	Ca-binding mitochondrial carrier protein SCaMC-2											1		1
Q6P6Q9	Ca uptake protein 1											1		1
Q8VHF5	Citrate synthase												1	1
O35796	Complement component 1 Q subcomponent-binding protein	*	1		1		1			1		1	1	1
P25809	Creatine kinase U-type											1		1
Q68FY0	Cytochrome b-c1 complex subunit 1						1					1		1
P32551	Cytochrome b-c1 complex subunit 2	*										1		1
Q7TQ16	Cytochrome b-c1 complex subunit 8	*										1		1
P62898	Cytochrome c, somatic						1						1	1
P00406	Cytochrome c oxidase subunit 2											1		1
P10888	Cytochrome c oxidase subunit 4 isoform 1											1	1	1
P11240	Cytochrome c oxidase subunit 5A											1		1
P11951	Cytochrome c oxidase subunit 6C-2											1		1
P35171	Cytochrome c oxidase subunit 7A2											1		1
Q6P6R2	Dihydrolipoyl dehydrogenase													1
Q01205	Dihydrolipoyllysine-residue succinyltransferase component of 2-oxoglutarate dehydrogenase	*										1	1	1
P08461	Dihydrolipoyllysine-residue acetyltransferase component of pyruvate dehydrogenase	*												1
Q2TA68	Dynamin-like 120 kDa protein						1					1		1
P85834	Elongation factor Tu											1		1
P56571	ES1 protein homolog													1
P10860	Glutamate dehydrogenase 1				1							1		1
P13264	Glutaminase kidney isoform				1		1							1
P35571	Glycerol-3-phosphate dehydrogenase											1		1
P05708	Hexokinase-1	*					1					1		1
Q99NA5	Isocitrate dehydrogenase [NAD] subunit a												1	1
Q68FX0	Isocitrate dehydrogenase [NAD] subunit b												1	1
P41565	Isocitrate dehydrogenase [NAD] subunit g 1													1
Q5XIN6	LETM1 and EF-hand domain-containing protein 1											1		1
Q5SGE0	Leucine-rich PPR motif-containing protein			1	1	1						1	1	1
P04636	Malate dehydrogenase											1	1	1
F1LU71	Methylglutaconyl-CoA hydratase													1
D4A7N1	MICOS complex subunit Mic25						1					1		1
P97700	Mitochondrial 2-oxoglutarate/malate carrier protein	*										1		1
Q505J6	Mitochondrial glutamate carrier 2	*										1		1
Q75Q41	Mitochondrial import receptor subunit TOM22 homolog											1		1
Q3KR86	Mitochondrial inner membrane protein (Fragment)											1		1
P63031	Mitochondrial pyruvate carrier 1											1		1
P38718	Mitochondrial pyruvate carrier 2											1	1	1
Q5BK63	NADH dehydrogenase [ubiquinone] 1 a subcomplex subunit 9											1	1	1
P19234	NADH dehydrogenase [ubiquinone] flavoprotein 2											1		1
P52504	NADH dehydrogenase [ubiquinone] iron-sulfur protein 6											1		1
Q66HF1	NADH-ubiquinone oxidoreductase 75 kDa subunit											1		1
P11661	NADH-ubiquinone oxidoreductase chain 5											1		1
P11915	Non-specific lipid-transfer protein				1		1	1				1	1	1
Q9R063	Peroxiredoxin-5				1		1						1	1
P16036	Phosphate carrier protein	*										1		1
P67779	Prohibitin		1		1				1			1	1	1
Q5XIH7	Prohibitin-2		1		1							1	1	1
P52873	Pyruvate carboxylase				1							1		1
P26284	Pyruvate dehydrogenase E1 component subunit a, somatic form												1	1
P49432	Pyruvate dehydrogenase E1 component subunit b												1	1
Q562B5	Serine/threonine-protein phosphatase PGAM5											1		1
P28042	Single-stranded DNA-binding protein												1	1
P48721	Stress-70 protein				1								1	1
P13086	Succinate-CoA ligase a	*					1					1		1
B0BN86	Transmembrane protein 11											1		1
Q5HZA9	Transmembrane protein 126A											1		1
P32089	Tricarboxylate transport protein	*										1	1	1
Q64428	Trifunctional enzyme subunit a											1		1
Q60587	Trifunctional enzyme subunit b							1				1		1
Q9JJW3	Up-regulated during skeletal muscle growth protein 5											1		1
Q9Z2L0	VDAC1											1	1	1
P81155	VDAC2											1	1	1
Q9R1Z0	VDAC3							1				1	1	1
